# Supplementary material for: Ag@4ATP-coated liposomes: SERS traceable delivery vehicles for living cells
Source: Royal Society of Chemistry journal article supplement (doi:10.1039/c4nr00557k), 2014-01-01
Supplement: c4nr00557k1.pdf [file c4nr00557k1.pdf]

## Electronic supplementary information

### Ag@4ATP-coated Liposomes: SERS Traceable Delivery Vehicles for Living Cells

Dan Zhu,<sup>a</sup> Zhuyuan Wang,<sup>\*a</sup> Shenfei Zong,<sup>a</sup> Hui Chen,<sup>a</sup> Xin Wu,<sup>a</sup> Yuwei Pei,<sup>a</sup> Peng Chen,<sup>a</sup> Xueqin Ma,<sup>a</sup> Yiping Cui<sup>\*a</sup>

[cyp@seu.edu.cn](mailto:cyp@seu.edu.cn), [wangzy@seu.edu.cn](mailto:wangzy@seu.edu.cn)

Advanced photonics center, Southeast University, Nanjing 210096, China

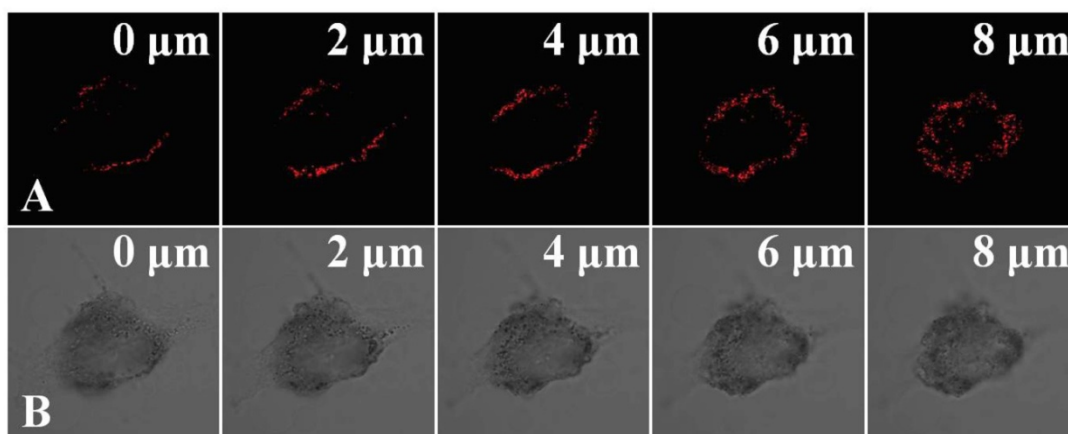

**Fig. S1** The SERS (A) and bright field (B) images at different depth of HeLa cells using a confocal laser scanning microscope.
